# Supplementary material for: TAF4b transcription networks regulating early oocyte differentiation
Source: bioRxiv or medRxiv preprint supplement (doi:10.1101/2021.07.18.452838), 2021-07-18
Supplement: Supplementary file [file media-1.pdf]

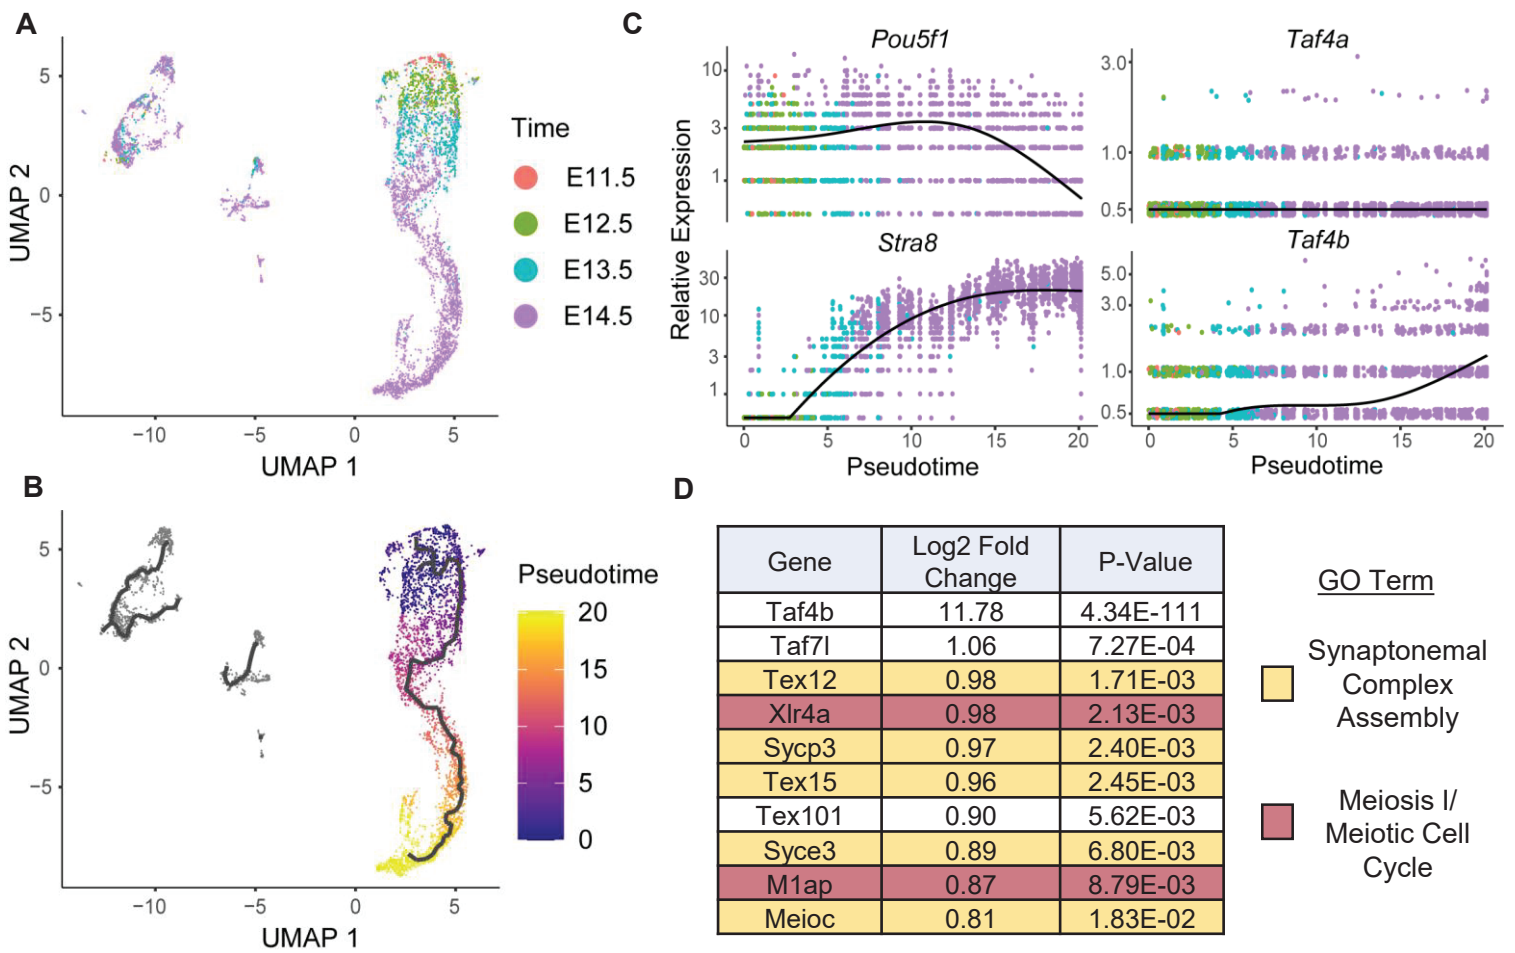

**Figure S1. Analysis of scRNA-seq dataset of E11.5 to E14.5 female germ cells.** (A) Uniform Manifold Approximation and Projection (UMAP) of oocytes colored by embryonic time point. (B) UMAP of oocytes colored by pseudotime analysis. (C) Expression of *Pou5f1*, *Stra8*, *Taf4b*, and *Taf4a* plotted in terms of pseudotime and colored based on embryonic time point. (D) Table of top 10 genes (in addition to *Taf4b*) that are expressed significantly higher in *Taf4b*-expressing oocytes. Colors indicate association with gene ontology (GO) term synaptonemal complex assembly (yellow) and meiosis I/meiotic cell cycle (red).
