# Supplementary material for: TAF4b transcription networks regulating early oocyte differentiation
Source: bioRxiv or medRxiv preprint supplement (doi:10.1101/2021.07.18.452838), 2021-07-18
Supplement: Supplementary file [file media-2.pdf]

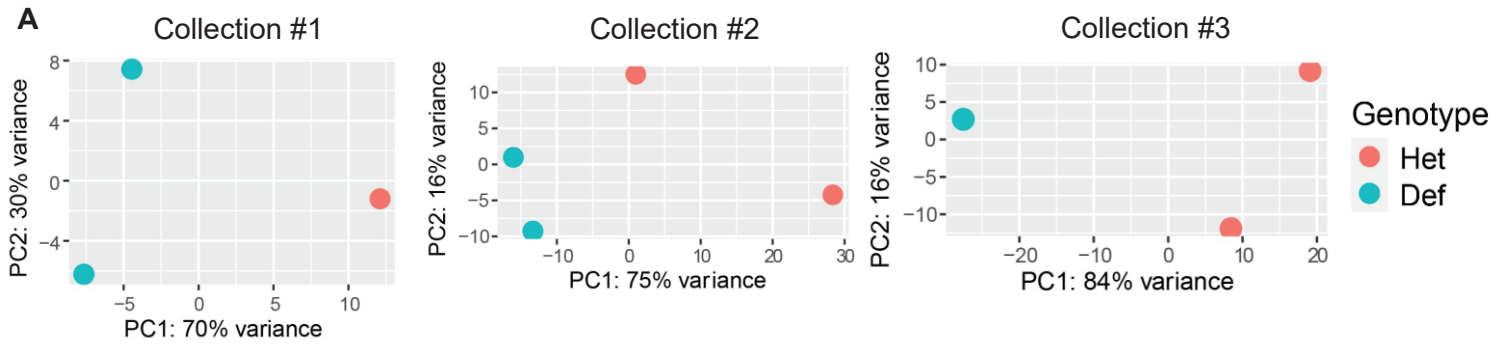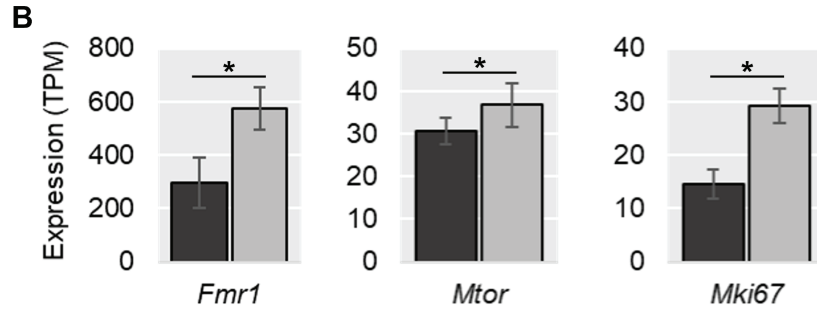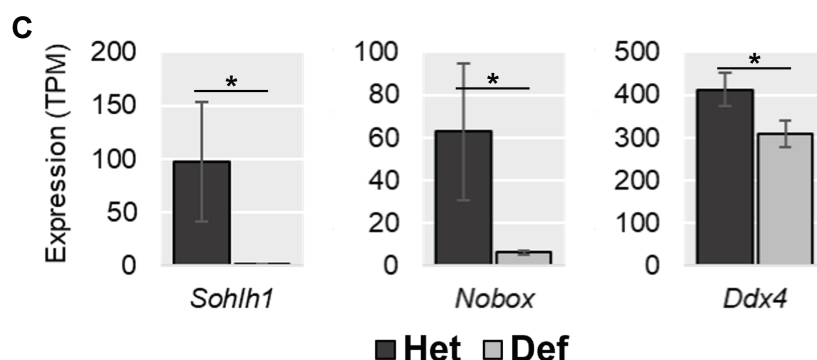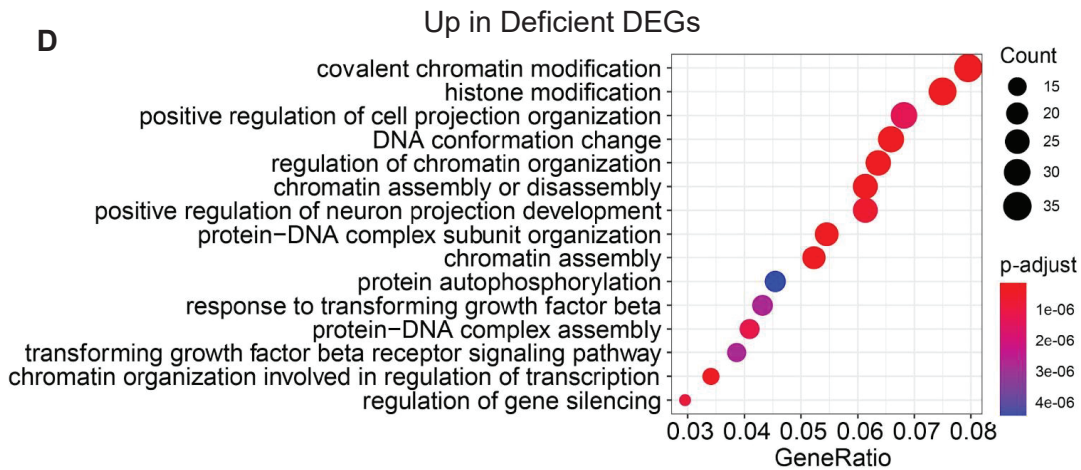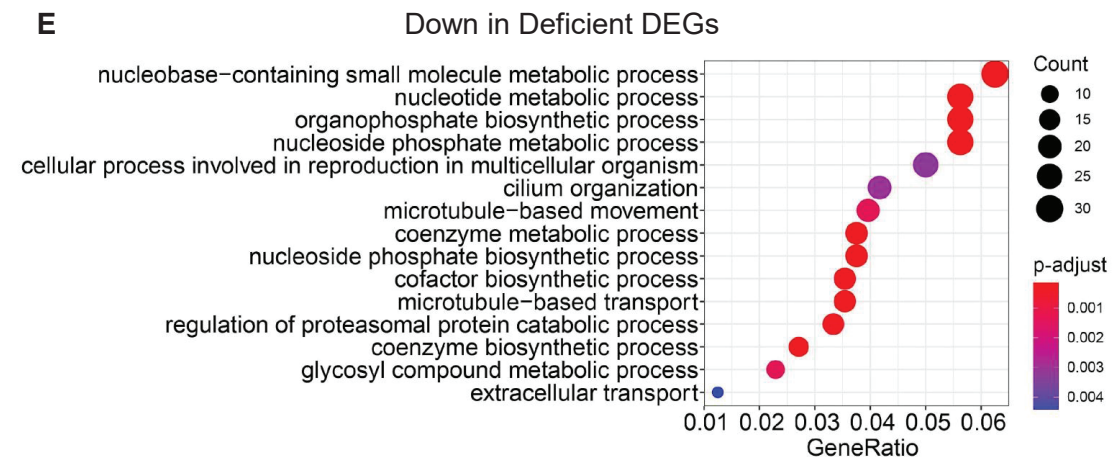

**Figure S2. E16.5 RNA-seq details.** (A) PCA plots of different E16.5 RNA-seq collections colored by genotype. (B) Expression levels of “up in deficient” DEGs in TPM. (C) Expression levels of “down in deficient” DEGs. (D) Biological process GO analysis dotplot of DEGs that were increased in *Taf4b*-deficient oocytes (“Up in Deficient”). (E) Biological process GO analysis dotplot of DEGs that were decreased in *Taf4b*-deficient oocytes (“Down in Deficient”).
