# Supplementary material for: TAF4b transcription networks regulating early oocyte differentiation
Source: bioRxiv or medRxiv preprint supplement (doi:10.1101/2021.07.18.452838), 2021-07-18
Supplement: Supplementary file [file media-3.pdf]

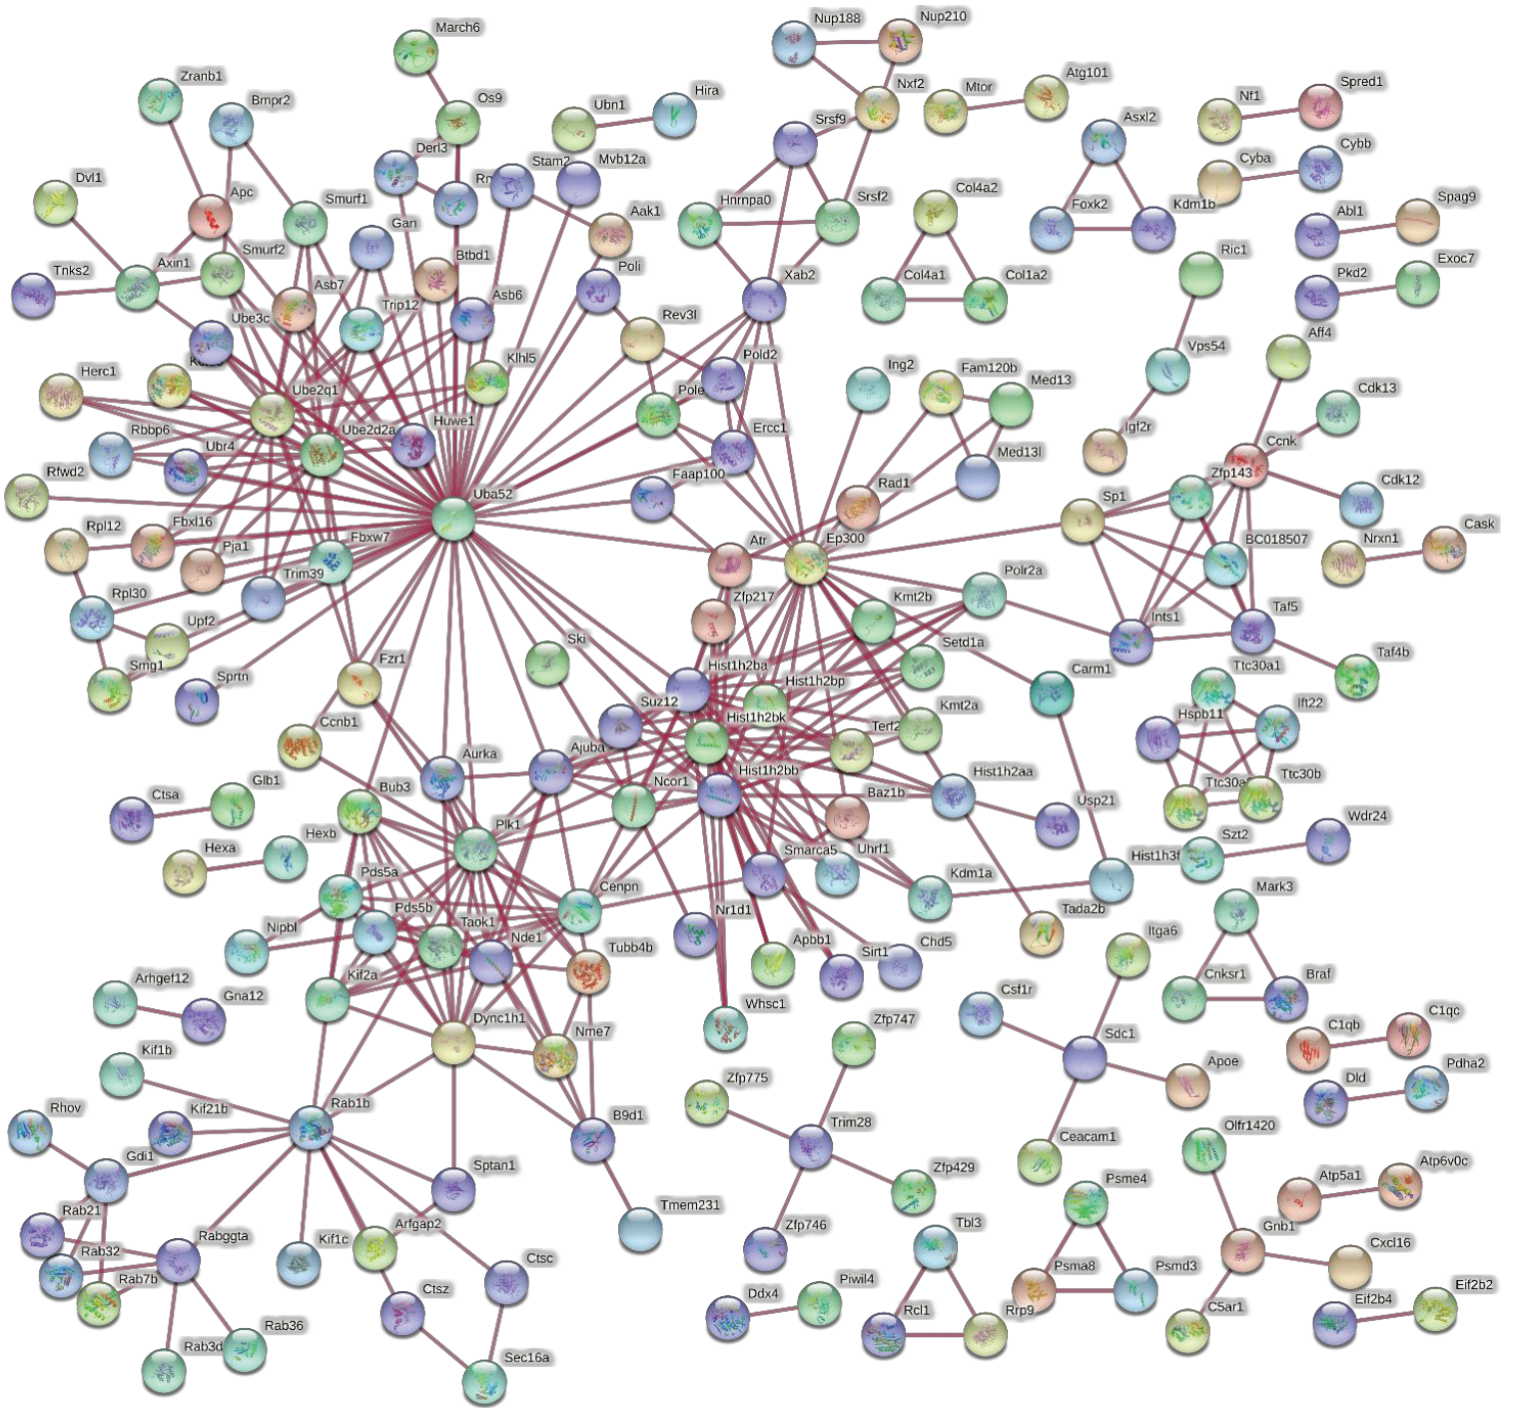

**Figure S3. Protein-protein interactions (PPIs) of E16.5 DEGs.** Plot generated by STRING of DEGs from E16.5 RNA-seq that had at least one PPI (physical network, highest confidence) (Szklarczyk et al. 2019). There was a significant enrichment of PPIs ( $p < 0.01$ ).
