# Supplementary material for: TAF4b transcription networks regulating early oocyte differentiation
Source: bioRxiv or medRxiv preprint supplement (doi:10.1101/2021.07.18.452838), 2021-07-18
Supplement: Supplementary file [file media-5.pdf]

**A**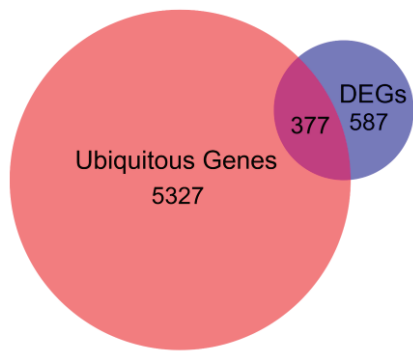**B**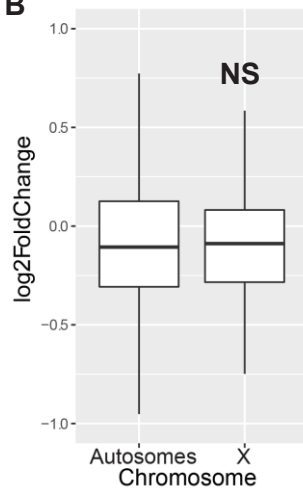

**Figure S5. Ubiquitous gene expression in E16.5 oocytes.** (A) Venn diagram of E16.5 DEGs and “Ubiquitous Genes” as identified in Sangrithi et al. 2017. Significant overlap in venn diagram ( $p < 0.0001$ , hypergeometric test). (B) Boxplots of  $\log_2$  fold change values from DESeq2 of all ubiquitous genes comparing autosomal  $\log_2$  fold change versus X chromosome  $\log_2$  fold change, NS = not significant (outliers removed).
