# Supplementary material for: TAF4b transcription networks regulating early oocyte differentiation
Source: bioRxiv or medRxiv preprint supplement (doi:10.1101/2021.07.18.452838), 2021-07-18
Supplement: Supplementary file [file media-6.pdf]

A

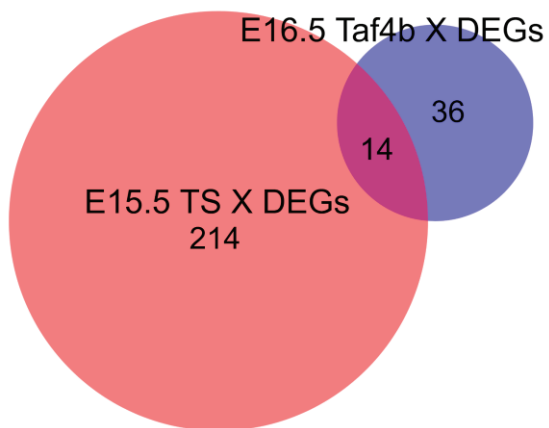

C

| Gene Name               | Ensembl Gene ID    |
|-------------------------|--------------------|
| 4930550L24Rik (Magea13) | ENSMUSG00000046180 |
| Atg4a                   | ENSMUSG00000079418 |
| Ccdc160                 | ENSMUSG00000073207 |
| Clcn5                   | ENSMUSG00000004317 |
| Fmr1                    | ENSMUSG00000000838 |
| Gdi1                    | ENSMUSG00000015291 |
| Huwe1                   | ENSMUSG00000025261 |
| Magea10                 | ENSMUSG00000043453 |
| Mageb4                  | ENSMUSG00000035427 |
| Nsdhl                   | ENSMUSG00000031349 |
| Nxf2                    | ENSMUSG00000009941 |
| Rps4x                   | ENSMUSG00000031320 |
| Shroom4                 | ENSMUSG00000068270 |
| Slc35a2                 | ENSMUSG00000031156 |

B

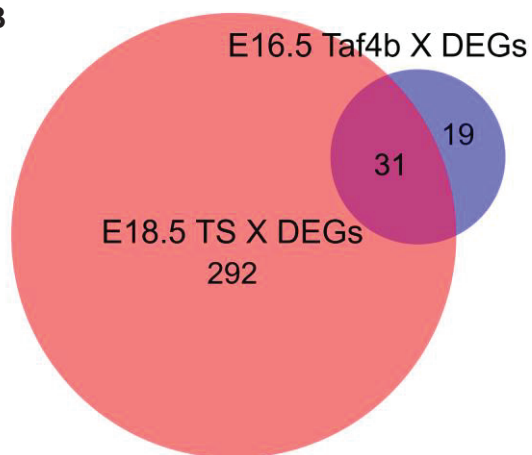

D

| Gene Name               | Ensembl Gene ID    |
|-------------------------|--------------------|
| 1700080O16Rik (Magea14) | ENSMUSG00000031118 |
| Atg4a                   | ENSMUSG00000079418 |
| AV320801                | ENSMUSG00000054994 |
| Bcorl1                  | ENSMUSG00000036959 |
| Ccdc160                 | ENSMUSG00000073207 |
| Clcn5                   | ENSMUSG00000004317 |
| Cybb                    | ENSMUSG00000015340 |
| Fgf13                   | ENSMUSG00000031137 |
| Fmr1                    | ENSMUSG00000000838 |
| Gab3                    | ENSMUSG00000032750 |
| Gdi1                    | ENSMUSG00000015291 |
| Gla                     | ENSMUSG00000031266 |
| Gm15023                 | ENSMUSG00000079432 |
| Gm364 (Tm9sf5)          | ENSMUSG00000079584 |
| Gm5128                  | ENSMUSG00000094004 |
| Gm7173 (Cfap47)         | ENSMUSG00000073077 |
| Huwe1                   | ENSMUSG00000025261 |
| Mageb18                 | ENSMUSG00000035427 |
| Mageb4                  | ENSMUSG00000035427 |
| Mbnl3                   | ENSMUSG00000036109 |
| Nkrf                    | ENSMUSG00000044149 |
| Nsdhl                   | ENSMUSG00000031349 |
| Nup62cl                 | ENSMUSG00000072944 |
| Nxf2                    | ENSMUSG00000009941 |
| Pja1                    | ENSMUSG00000034403 |
| Rhox2d                  | ENSMUSG00000095698 |
| Rps4x                   | ENSMUSG00000031320 |
| Shroom4                 | ENSMUSG00000068270 |
| Slc35a2                 | ENSMUSG00000031156 |
| Tktl1                   | ENSMUSG00000031397 |
| Tsga8                   | ENSMUSG00000035522 |

**Figure S6. Shared X chromosome DEGs between TS dataset and *Taf4b*-deficiency.** (A) Venn diagram of all E16.5 *Taf4b* X chromosome DEGs compared with E15.5 TS X chromosome DEGs (protein-coding, p-adj < 0.05, avg TPM > 1). No significant overlap in Venn diagram (hypergeometric test). (B) Venn diagram of all E16.5 *Taf4b* X chromosome DEGs compared with E18.5 TS X chromosome DEGs (protein-coding, p-adj < 0.05, avg TPM > 1). Significant overlap in Venn diagram (p < 0.0001, hypergeometric test). (C) List of the 14 DEGs shared in (A). (D) List of the 31 DEGs shared in (B).
