# Supplementary material for: TAF4b transcription networks regulating early oocyte differentiation
Source: bioRxiv or medRxiv preprint supplement (doi:10.1101/2021.07.18.452838), 2021-07-18
Supplement: Supplementary file [file media-7.pdf]

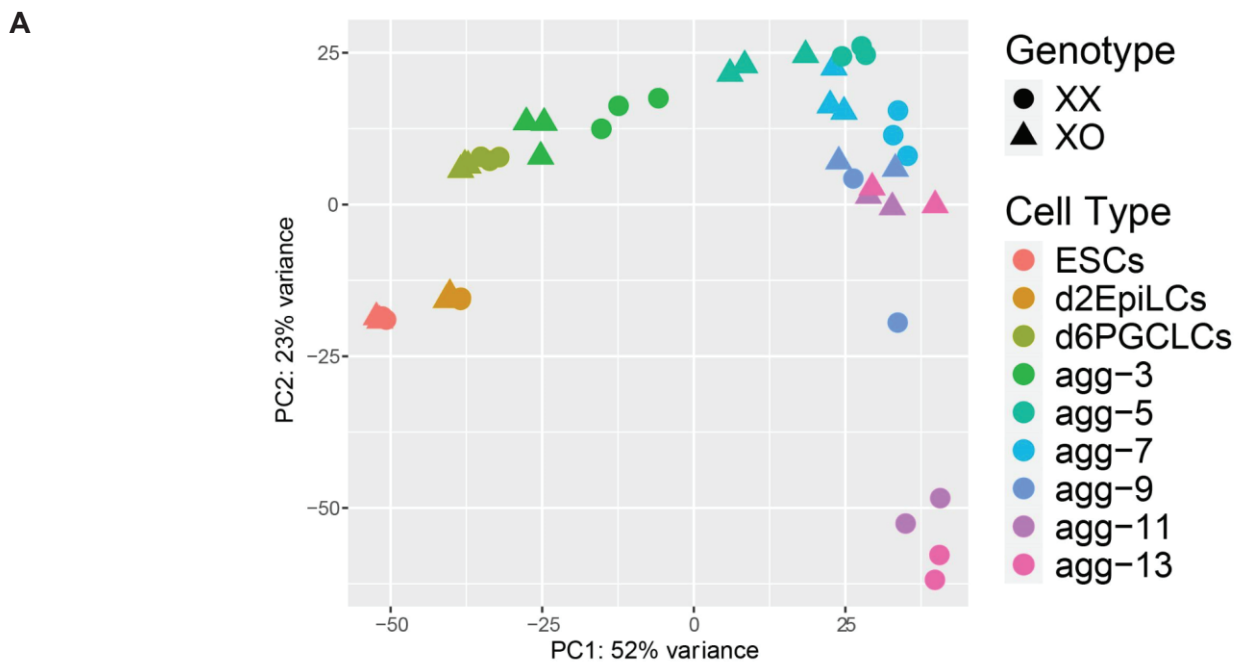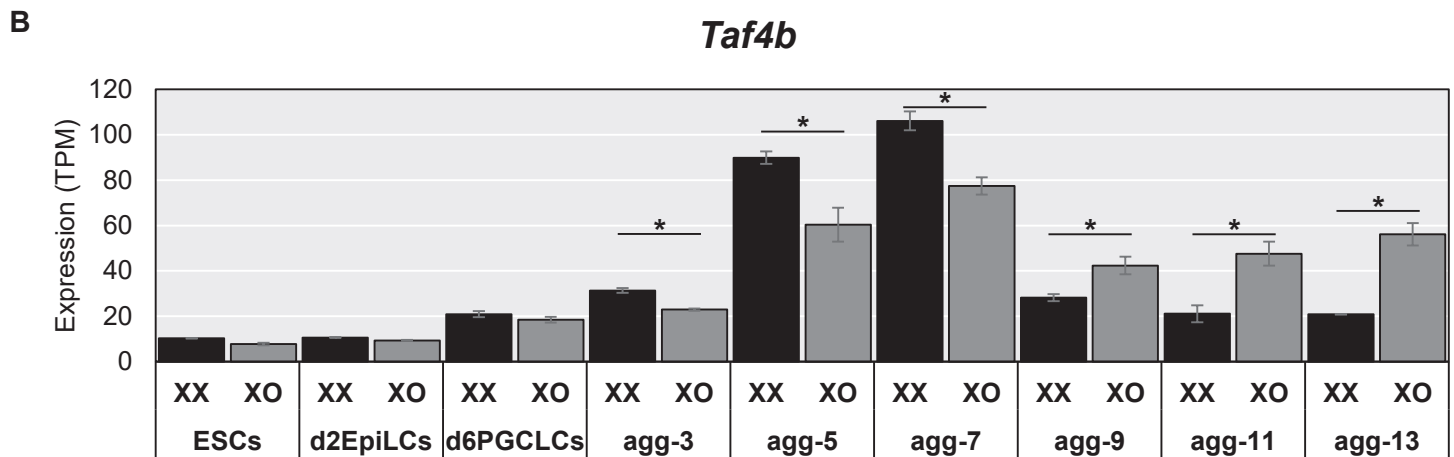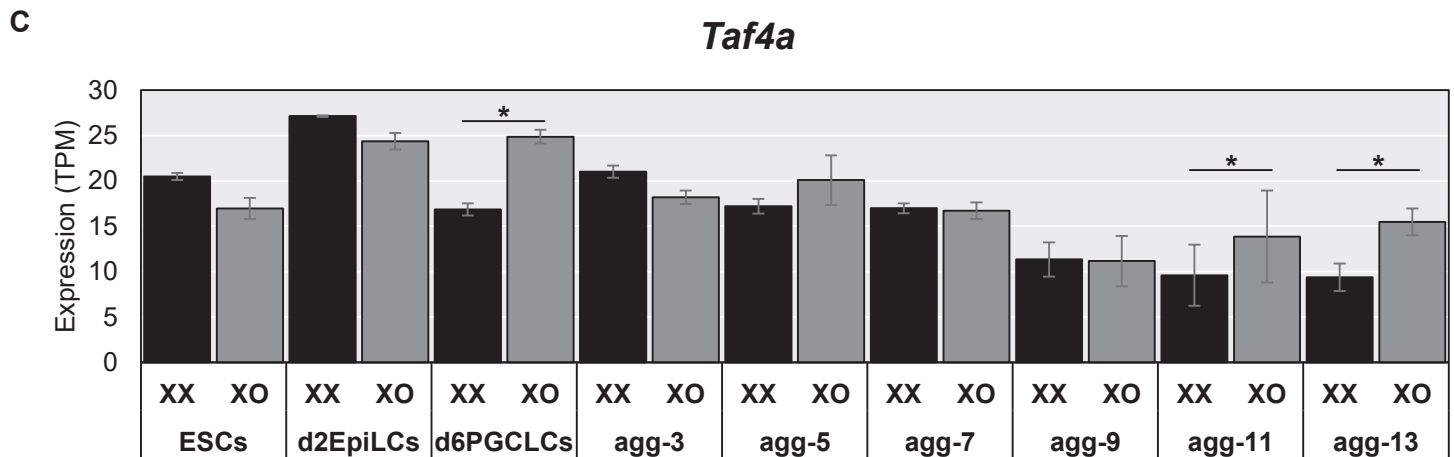

**Figure S7. Effects of XO on *Taf4b* in in vitro germ cell differentiation culture system.** (A) PCA plot of cultured cells from Hamada et al., 2020, labeled based on cell type and genotype. (B) Expression levels of *Taf4b* in XX versus XO cultured cells (\* =  $p < 0.05$ , avg TPM > 1). (C) Expression levels of *Taf4a* in XX versus XO cultured cells. Error bars indicate  $\pm$  standard error of the mean (SEM).
