# Supplementary material for: TAF4b transcription networks regulating early oocyte differentiation
Source: bioRxiv or medRxiv preprint supplement (doi:10.1101/2021.07.18.452838), 2021-07-18
Supplement: Supplementary file [file media-13.pdf]

**Table S5: Chromosome distribution of Up in Deficient DEGs**

|           |             |           | Expected     | Chi <sup>2</sup> | p-value       |
|-----------|-------------|-----------|--------------|------------------|---------------|
| 1         | 1439        | 24        | 29.95        | 1.264            | 0.2609        |
| 2         | 1630        | 40        | 33.93        | 1.172            | 0.279         |
| <b>3</b>  | <b>1178</b> | <b>14</b> | <b>24.52</b> | <b>4.766</b>     | <b>0.029</b>  |
| 4         | 1290        | 30        | 26.85        | 0.392            | 0.5311        |
| 5         | 1499        | 38        | 31.20        | 1.589            | 0.2074        |
| 6         | 1145        | 18        | 23.83        | 1.504            | 0.2201        |
| 7         | 1750        | 40        | 36.43        | 0.381            | 0.5372        |
| 8         | 1116        | 21        | 23.23        | 0.225            | 0.6351        |
| 9         | 1281        | 28        | 26.66        | 0.071            | 0.7898        |
| 10        | 1039        | 18        | 21.63        | 0.638            | 0.4245        |
| <b>11</b> | <b>1592</b> | <b>48</b> | <b>33.14</b> | <b>7.181</b>     | <b>0.0074</b> |
| 12        | 901         | 24        | 18.75        | 1.529            | 0.2162        |
| <b>13</b> | <b>940</b>  | <b>31</b> | <b>19.57</b> | <b>6.977</b>     | <b>0.0083</b> |
| 14        | 764         | 10        | 15.90        | 2.269            | 0.132         |
| 15        | 825         | 14        | 17.17        | 0.609            | 0.4353        |
| 16        | 655         | 9         | 13.63        | 1.623            | 0.2027        |
| 17        | 1056        | 19        | 21.98        | 0.424            | 0.5148        |
| 18        | 571         | 12        | 11.89        | 0.001            | 0.9731        |
| 19        | 673         | 16        | 14.01        | 0.292            | 0.5889        |
| <b>X</b>  | <b>900</b>  | <b>9</b>  | <b>18.73</b> | <b>5.268</b>     | <b>0.0217</b> |
