# Supplementary material for: TAF4b transcription networks regulating early oocyte differentiation
Source: bioRxiv or medRxiv preprint supplement (doi:10.1101/2021.07.18.452838), 2021-07-18
Supplement: Supplementary file [file media-18.pdf]

**Table S10: Cell numbers for RNA-seq samples**

| Age       | Genotype     | Sample #     | Cell # |       |
|-----------|--------------|--------------|--------|-------|
| E14.5     | Wildtype     | 1            | 7,942  |       |
|           |              | 2            | 18,256 |       |
|           | Heterozygous | 1            | 12,553 |       |
|           |              | 2            | 12,897 |       |
|           |              | 3            | 2,822  |       |
|           |              | 4            | 19,308 |       |
|           | Deficient    | 1            | 9,112  |       |
|           |              | 2            | 5,233  |       |
|           |              | 3            | 9,893  |       |
|           |              | 4            | 7,035  |       |
|           | E16.5        | Heterozygous | 1      | 7,199 |
|           |              |              | 2      | 2,512 |
| 3         |              |              | 3,399  |       |
| 4         |              |              | 9,369  |       |
| 5         |              |              | 14,402 |       |
| Deficient |              | 1            | 2,181  |       |
|           |              | 2            | 3,547  |       |
|           |              | 3            | 19,089 |       |
|           |              | 4            | 5,688  |       |
|           |              | 5            | 9,076  |       |
